# Supplementary material
Source: publisher site journal article supplement (https://www.dovepress.com/article/343269)
Supplement: Supplementary file 1 [file get_supplementary_file.php]

***MRI parameters***

Our parameters were the same as our previous study 15. MRI scanning was performed using a 3-Tesla MR scanner (Trio; Siemens, Munich, Germany). High-resolution T1-weighted anatomical images were acquired with a three-dimensional spoiled gradient-recalled sequence in a sagittal orientation: 176 images (repetition time= 1900ms, echo time= 2.26 ms, thickness= 1.0 mm, gap =0.5mm, acquisition matrix=256 × 256, the field of view =250mm × 250 mm, flip angle =9°) were obtained. Finally, a total of 240 functional images (repetition time =2000 ms, echo time=30 ms, thickness=4.0 mm, gap=1.2 mm, acquisition matrix=64×64, flip angle=90°, the field of view=220 mm×220 mm, 29 axial slices with Gradient-Recalled Echo-Planar Imaging pulse sequence) covering the whole brain were obtained. **1. In terms of controlling motion artifacts, we strive for the cooperation of patients before MRI scanning subjects, try to shorten the total image acquisition time, and place sponge pads on both sides of the patient's head to fix the patient's head to reduce motion artifacts; 2. We require the patient to remove metal foreign bodies in the body or on the body surface to eliminate metal artifacts; 3. We use interlaminar scanning to reduce interlaminar overlap artifacts; 4. We check the shielding effect of the subjects in the machine room and regularly check the integrity of the equipment to avoid artifacts caused by equipment and external interference; 5. In addition, subjects with head movement > 2**° **and movement more than 2mm were excluded during data processing.** All subjects underwent the MRI scanning with their eyes closed.

***fMRI data preprocessing***

All preprocessing was performed using the toolbox for Data Processing & Analysis of Brain Imaging (DPABI, http://www.rfmri.org/dpabi)25, which is based on Statistical Parametric Mapping (SPM8) (http://www.fil.ion.ucl.ac.uk) implemented in MATLAB 2013a (MathWorks, Natick, MA, USA) briefly the following steps: 1) DICOM format of the functional images converted to NIFTI format the first ten volumes of each subject were discarded due to the signal reaching equilibrium. 2) The remaining 230 volumes of functional BOLD images were corrected for slice timing effects, motion-corrected, and realigned. Data from subjects whose head motion was more than 2 mm or for whom rotation exceeded 2°during scanning were excluded according to the criteria of Van Dijk et al 26. 3) Individual T1-weighted MPRAGE structural images were registered to the mean fMRI data, then resulting aligned T1-weighted images were segmented using the Diffeomorphic Anatomical Registration Through Exponentiated Lie Algebra (DARTEL) toolbox for improving spatial precise in the normalization of fMRI data 27. Normalized data (in Montreal Neurological Institute [MNI] 152 space) were re-sliced at a resolution of 3 × 3 × 3 mm3. 4) smoothing with a 6 mm full-width-half-maximum Gaussian kernel; 5) linear regression analysis was used to regress out several covariate(six head motion parameters, mean framewise displacement (FD), global brain signal, and averaged signal from white matter signal and cerebrospinal fluid). 6) Data with linear trend were removed, and temporal band-pass was filtered (0.01–0.1 Hz).
